# Supplementary material
Source: PubMed Central journal article supplement (PMC4723425)
Supplement: NIHMS312224-supplement-02.pdf [file NIHMS312224-supplement-02.pdf]

**Supplemental Table 2:** Tests of gene-gene interactions for pairs of SNPs in SNCA, MAPT and LRRK2 in the sample overall as well as in strata based on sex, type of control (sibling or unrelated) and age at onset of the case. Results are sorted by p-value for the interaction in the sample overall.

| SNP1       | Gene1 | SNP2       | Gene2 | Interaction effect<br>ALL pairs |         | Interaction effect<br>CC pairs |         | Interaction effect<br>CS pairs |         | Interaction effect<br>Men-Men pairs |         | Interaction effect<br>Women-Women pairs |         | Interaction effect<br>Age at onset<Q2 pairs |         | Interaction effect<br>Age at onset>Q2 pairs |         |
|------------|-------|------------|-------|---------------------------------|---------|--------------------------------|---------|--------------------------------|---------|-------------------------------------|---------|-----------------------------------------|---------|---------------------------------------------|---------|---------------------------------------------|---------|
|            |       |            |       | Coefficient                     | P value | Coefficient                    | P value | Coefficient                    | P value | Coefficient                         | P value | Coefficient                             | P value | Coefficient                                 | P value | Coefficient                                 | P value |
| rs16940758 | MAPT  | rs2583959  | SNCA  | 0.4078                          | 0.0049  | 0.5407                         | 0.0130  | 0.3670                         | 0.0711  | 0.4498                              | 0.0232  | 0.3029                                  | 0.2301  | 0.1994                                      | 0.3374  | 0.6527                                      | 0.0015  |
| rs2435211  | MAPT  | rs3775423  | SNCA  | -0.5097                         | 0.0105  | -0.4278                        | 0.1376  | -0.6183                        | 0.0297  | -0.6325                             | 0.0316  | -0.4171                                 | 0.2245  | -0.5997                                     | 0.0309  | -0.4267                                     | 0.1444  |
| rs17484286 | LRRK2 | rs3775423  | SNCA  | 0.8451                          | 0.0117  | 0.5523                         | 0.2240  | 1.2590                         | 0.0225  | 0.6386                              | 0.1983  | 0.8728                                  | 0.0878  | 0.5249                                      | 0.2524  | 1.1153                                      | 0.0271  |
| rs17484286 | LRRK2 | rs3775439  | SNCA  | 0.6504                          | 0.0192  | 0.5905                         | 0.1110  | 0.9792                         | 0.0349  | 0.2484                              | 0.5468  | 1.0223                                  | 0.0167  | 0.8834                                      | 0.0268  | 0.3515                                      | 0.3866  |
| rs8079215  | MAPT  | rs3775423  | SNCA  | 0.4874                          | 0.0214  | 0.1637                         | 0.5722  | 0.9442                         | 0.0036  | 0.4052                              | 0.1746  | 0.3352                                  | 0.3642  | 0.7140                                      | 0.0263  | 0.2722                                      | 0.3346  |
| rs17484286 | LRRK2 | REP1-263   | SNCA  | 0.8516                          | 0.0233  | 0.8403                         | 0.1046  | 0.8527                         | 0.1465  | 0.7089                              | 0.2327  | 0.9017                                  | 0.0852  | 0.5963                                      | 0.2798  | 0.9723                                      | 0.0646  |
| rs7307562  | LRRK2 | rs9995651  | SNCA  | -0.4774                         | 0.0383  | -0.8044                        | 0.0220  | -0.3406                        | 0.2807  | -0.9863                             | 0.0038  | 0.0530                                  | 0.8943  | -0.4200                                     | 0.2162  | -0.4891                                     | 0.1219  |
| rs17466521 | LRRK2 | rs2572324  | SNCA  | -0.2422                         | 0.0416  | 0.0399                         | 0.8107  | -0.6114                        | 0.0007  | -0.1315                             | 0.4062  | -0.2134                                 | 0.3210  | -0.3842                                     | 0.0239  | -0.1314                                     | 0.4378  |
| rs17484286 | LRRK2 | rs9995651  | SNCA  | 0.9504                          | 0.0445  | 0.7639                         | 0.2952  | 1.1992                         | 0.0683  | 1.5321                              | 0.1385  | 0.9197                                  | 0.1185  | 0.7681                                      | 0.2929  | 0.9795                                      | 0.1256  |
| rs10784486 | LRRK2 | rs2435211  | MAPT  | -0.2201                         | 0.0490  | -0.2530                        | 0.1246  | -0.2614                        | 0.0978  | -0.2915                             | 0.0517  | -0.0388                                 | 0.8548  | -0.2016                                     | 0.1735  | -0.2723                                     | 0.1151  |
| rs17484286 | LRRK2 | rs2736990  | SNCA  | 0.3460                          | 0.0502  | 0.1210                         | 0.6178  | 0.8878                         | 0.0018  | -0.0481                             | 0.8457  | 0.5955                                  | 0.0429  | 0.8751                                      | 0.0014  | -0.0730                                     | 0.7650  |
| rs16940758 | MAPT  | rs2572324  | SNCA  | 0.2838                          | 0.0509  | 0.5163                         | 0.0187  | 0.1327                         | 0.5142  | 0.2634                              | 0.1766  | 0.3135                                  | 0.2337  | 0.0654                                      | 0.7546  | 0.5209                                      | 0.0114  |
| rs17466521 | LRRK2 | rs356218   | SNCA  | -0.2258                         | 0.0513  | 0.0042                         | 0.9796  | -0.5077                        | 0.0031  | -0.1426                             | 0.3507  | -0.1595                                 | 0.4570  | -0.4080                                     | 0.0133  | -0.0729                                     | 0.6613  |
| rs10784486 | LRRK2 | rs9995651  | SNCA  | 0.4654                          | 0.0562  | 0.7733                         | 0.0274  | 0.1578                         | 0.6542  | 0.8432                              | 0.0194  | 0.3909                                  | 0.3662  | 0.1959                                      | 0.5916  | 0.7018                                      | 0.0347  |
| rs6581668  | LRRK2 | rs2435211  | MAPT  | -0.1909                         | 0.0654  | -0.2305                        | 0.1477  | -0.1889                        | 0.1802  | -0.3592                             | 0.0130  | 0.0070                                  | 0.9711  | -0.0606                                     | 0.6714  | -0.3331                                     | 0.0297  |
| rs6581668  | LRRK2 | REP1-259   | SNCA  | 0.1908                          | 0.0661  | 0.1145                         | 0.4424  | 0.3027                         | 0.0450  | 0.2013                              | 0.1455  | 0.2270                                  | 0.2430  | 0.3685                                      | 0.0206  | 0.0763                                      | 0.5847  |
| rs7307562  | LRRK2 | rs3775423  | SNCA  | -0.3173                         | 0.0783  | -0.2659                        | 0.3189  | -0.4330                        | 0.0884  | -0.4503                             | 0.0701  | 0.0059                                  | 0.9856  | -0.1978                                     | 0.4339  | -0.4137                                     | 0.1092  |
| rs7307562  | LRRK2 | rs878918   | MAPT  | -0.1761                         | 0.0845  | -0.1570                        | 0.3271  | -0.2175                        | 0.1145  | -0.0462                             | 0.7506  | -0.3211                                 | 0.0907  | -0.1232                                     | 0.4011  | -0.2175                                     | 0.1268  |
| rs878918   | MAPT  | rs356218   | SNCA  | -0.1843                         | 0.0857  | -0.1547                        | 0.3284  | -0.2482                        | 0.1011  | 0.0146                              | 0.9212  | -0.3137                                 | 0.1122  | -0.3447                                     | 0.0274  | -0.0630                                     | 0.6721  |
| rs10784486 | LRRK2 | rs3775423  | SNCA  | 0.3131                          | 0.0906  | 0.4248                         | 0.1019  | 0.1881                         | 0.4911  | 0.3369                              | 0.1817  | 0.3787                                  | 0.2778  | 0.0428                                      | 0.8664  | 0.6335                                      | 0.0225  |
| rs17466521 | LRRK2 | rs2583959  | SNCA  | -0.2002                         | 0.0923  | 0.1358                         | 0.4301  | -0.5339                        | 0.0020  | -0.1429                             | 0.3621  | -0.0954                                 | 0.6727  | -0.3278                                     | 0.0536  | -0.0972                                     | 0.5676  |
| rs11175922 | LRRK2 | rs16940806 | MAPT  | -0.2127                         | 0.0941  | -0.1943                        | 0.2866  | -0.2472                        | 0.1839  | -0.1419                             | 0.4139  | -0.4219                                 | 0.0700  | -0.1982                                     | 0.2766  | -0.1951                                     | 0.2755  |
| rs11175922 | LRRK2 | MAPT H1/H2 | MAPT  | -0.2136                         | 0.0951  | -0.2383                        | 0.2013  | -0.2183                        | 0.2372  | -0.1314                             | 0.4486  | -0.4384                                 | 0.0649  | -0.2163                                     | 0.2439  | -0.1821                                     | 0.3073  |
| rs878918   | MAPT  | rs2572324  | SNCA  | -0.1838                         | 0.0992  | -0.1847                        | 0.2661  | -0.2199                        | 0.1598  | -0.0300                             | 0.8460  | -0.2190                                 | 0.2850  | -0.4009                                     | 0.0152  | -0.0200                                     | 0.8965  |
| rs10784486 | LRRK2 | MAPT H1/H2 | MAPT  | 0.2192                          | 0.1036  | 0.2811                         | 0.1758  | 0.1851                         | 0.3133  | 0.2030                              | 0.2652  | 0.1636                                  | 0.5135  | 0.1090                                      | 0.5558  | 0.3455                                      | 0.0827  |
| rs7307562  | LRRK2 | rs3775439  | SNCA  | -0.2340                         | 0.1057  | -0.2624                        | 0.2073  | -0.3519                        | 0.0983  | -0.2542                             | 0.1908  | 0.0120                                  | 0.9661  | -0.4726                                     | 0.0320  | -0.0408                                     | 0.8331  |
| rs6581668  | LRRK2 | rs1372520  | SNCA  | 0.1898                          | 0.1098  | 0.1241                         | 0.4765  | 0.2517                         | 0.1338  | 0.3345                              | 0.0346  | 0.0443                                  | 0.8455  | 0.2772                                      | 0.1324  | 0.1701                                      | 0.2827  |
| rs16940758 | MAPT  | rs356218   | SNCA  | 0.2256                          | 0.1127  | 0.4843                         | 0.0238  | 0.0122                         | 0.9514  | 0.2486                              | 0.1944  | 0.2331                                  | 0.3549  | -0.0313                                     | 0.8764  | 0.5196                                      | 0.0113  |
| rs7307562  | LRRK2 | rs2435211  | MAPT  | 0.1730                          | 0.1168  | 0.2273                         | 0.1702  | 0.2051                         | 0.1835  | 0.1221                              | 0.4258  | 0.2714                                  | 0.1565  | 0.1353                                      | 0.3576  | 0.2256                                      | 0.1860  |
| rs10784486 | LRRK2 | rs878918   | MAPT  | 0.1707                          | 0.1232  | 0.2305                         | 0.1767  | 0.1487                         | 0.3263  | 0.1982                              | 0.1953  | 0.0628                                  | 0.7628  | 0.1693                                      | 0.2694  | 0.1693                                      | 0.2979  |
| rs6581668  | LRRK2 | rs3775423  | SNCA  | 0.2694                          | 0.1257  | 0.3477                         | 0.1694  | 0.2392                         | 0.3441  | 0.1867                              | 0.4500  | 0.6300                                  | 0.0449  | 0.1359                                      | 0.5771  | 0.4151                                      | 0.1085  |
| rs6581668  | LRRK2 | REP1 score | SNCA  | -0.1294                         | 0.1276  | -0.0329                        | 0.7920  | -0.2419                        | 0.0464  | -0.1222                             | 0.2841  | -0.1098                                 | 0.4768  | -0.2462                                     | 0.0538  | -0.0467                                     | 0.6910  |
| rs1491939  | LRRK2 | rs4792891  | MAPT  | 0.3301                          | 0.1286  | 0.4122                         | 0.2300  | 0.1404                         | 0.6363  | 0.6770                              | 0.0309  | -0.3397                                 | 0.4116  | 0.3117                                      | 0.3071  | 0.4469                                      | 0.1725  |
| rs6581668  | LRRK2 | rs356186   | SNCA  | 0.1948                          | 0.1306  | 0.0311                         | 0.8747  | 0.3224                         | 0.0682  | 0.3706                              | 0.0367  | -0.0631                                 | 0.7892  | 0.2363                                      | 0.2296  | 0.1774                                      | 0.3073  |
| rs8079215  | MAPT  | rs9995651  | SNCA  | 0.4212                          | 0.1333  | 0.1373                         | 0.7491  | 0.6413                         | 0.0937  | -0.0099                             | 0.9800  | 0.9085                                  | 0.0822  | 0.3147                                      | 0.4646  | 0.4503                                      | 0.2282  |
| rs878918   | MAPT  | rs3775439  | SNCA  | 0.2329                          | 0.1414  | 0.3285                         | 0.1576  | 0.2731                         | 0.2255  | 0.0165                              | 0.9396  | 0.4223                                  | 0.1501  | 0.0025                                      | 0.9915  | 0.4448                                      | 0.0393  |
| rs10784486 | LRRK2 | rs16940806 | MAPT  | 0.1975                          | 0.1421  | 0.2725                         | 0.1862  | 0.1445                         | 0.4338  | 0.1718                              | 0.3462  | 0.1816                                  | 0.4663  | 0.0588                                      | 0.7495  | 0.3611                                      | 0.0704  |
| rs17466521 | LRRK2 | rs2736990  | SNCA  | -0.1650                         | 0.1439  | -0.0460                        | 0.7677  | -0.3456                        | 0.0464  | -0.0553                             | 0.7052  | -0.2447                                 | 0.2447  | -0.3480                                     | 0.0295  | -0.0114                                     | 0.9442  |
| rs2435211  | MAPT  | rs9995651  | SNCA  | -0.3795                         | 0.1440  | -0.1128                        | 0.7806  | -0.4966                        | 0.1531  | -0.4155                             | 0.3010  | -0.7051                                 | 0.1201  | -0.4507                                     | 0.1894  | -0.2686                                     | 0.5127  |
| rs878918   | MAPT  | rs3775423  | SNCA  | 0.2761                          | 0.1507  | 0.2941                         | 0.2820  | 0.3765                         | 0.1775  | 0.1134                              | 0.6643  | 0.3562                                  | 0.2949  | 0.1279                                      | 0.6414  | 0.4405                                      | 0.1049  |
| rs10784486 | LRRK2 | rs4792891  | MAPT  | 0.1596                          | 0.1676  | 0.1588                         | 0.3528  | 0.1425                         | 0.3810  | -0.0479                             | 0.7645  | 0.3137                                  | 0.1346  | 0.0134                                      | 0.9318  | 0.3511                                      | 0.0491  |
| rs8079215  | MAPT  | rs3775439  | SNCA  | 0.2251                          | 0.1719  | 0.0685                         | 0.7699  | 0.4676                         | 0.0511  | 0.0271                              | 0.9079  | 0.3565                                  | 0.2425  | 0.4052                                      | 0.1104  | 0.0872                                      | 0.6908  |
| rs6581668  | LRRK2 | rs2583959  | SNCA  | -0.1483                         | 0.1743  | -0.2725                        | 0.0875  | -0.0863                        | 0.5806  | -0.1708                             | 0.2639  | -0.2785                                 | 0.1679  | -0.0808                                     | 0.6037  | -0.2262                                     | 0.1488  |
| rs6581668  | LRRK2 | rs2435200  | MAPT  | 0.1302                          | 0.1848  | 0.1226                         | 0.4180  | 0.1381                         | 0.2987  | 0.1858                              | 0.1837  | 0.0345                                  | 0.8382  | 0.1134                                      | 0.3987  | 0.1883                                      | 0.1964  |
| rs17466521 | LRRK2 | MAPT H1/H2 | MAPT  | -0.1824                         | 0.1906  | -0.0899                        | 0.6563  | -0.2927                        | 0.1404  | -0.1947                             | 0.2890  | 0.1086                                  | 0.6878  | 0.1250                                      | 0.5245  | -0.5029                                     | 0.0129  |
| rs7307562  | LRRK2 | rs356218   | SNCA  | 0.1428                          | 0.1909  | 0.1892                         | 0.2316  | 0.0718                         | 0.6504  | 0.2032                              | 0.1719  | -0.0904                                 | 0.6500  | 0.1986                                      | 0.2134  | 0.0990                                      | 0.5115  |
| rs6581668  | LRRK2 | rs4792891  | MAPT  | 0.1350                          | 0.1954  | 0.2058                         | 0.1829  | 0.0726                         | 0.6193  | 0.0444                              | 0.7637  | 0.1254                                  | 0.4923  | 0.0589                                      | 0.6877  | 0.2406                                      | 0.1160  |

**Supplemental Table 2:** Tests of gene-gene interactions for pairs of SNPs in SNCA, MAPT and LRRK2 in the sample overall as well as in strata based on sex, type of control (sibling or unrelated) and age at onset of the case. Results are sorted by p-value for the interaction in the sample overall.

| SNP1       | Gene1 | SNP2       | Gene2 | Interaction effect<br>ALL pairs |         | Interaction effect<br>CC pairs |         | Interaction effect<br>CS pairs |         | Interaction effect<br>Men-Men pairs |         | Interaction effect<br>Women-Women pairs |         | Interaction effect<br>Age at onset<Q2 pairs |         | Interaction effect<br>Age at onset>Q2 pairs |         |
|------------|-------|------------|-------|---------------------------------|---------|--------------------------------|---------|--------------------------------|---------|-------------------------------------|---------|-----------------------------------------|---------|---------------------------------------------|---------|---------------------------------------------|---------|
|            |       |            |       | Coefficient                     | P value | Coefficient                    | P value | Coefficient                    | P value | Coefficient                         | P value | Coefficient                             | P value | Coefficient                                 | P value | Coefficient                                 | P value |
| rs16940758 | MAPT  | rs3775423  | SNCA  | -0.2954                         | 0.1956  | -0.5914                        | 0.0754  | -0.0716                        | 0.8263  | -0.3513                             | 0.2840  | -0.2197                                 | 0.5577  | -0.6276                                     | 0.0514  | -0.0175                                     | 0.9581  |
| rs2435211  | MAPT  | rs3775439  | SNCA  | -0.2038                         | 0.2053  | -0.1122                        | 0.6077  | -0.3371                        | 0.1836  | -0.2621                             | 0.2312  | -0.3032                                 | 0.3042  | -0.3583                                     | 0.1098  | -0.0711                                     | 0.7660  |
| rs6581668  | LRRK2 | rs9995651  | SNCA  | 0.2870                          | 0.2099  | 0.5302                         | 0.1284  | 0.0530                         | 0.8656  | 0.4442                              | 0.2114  | 0.7134                                  | 0.0665  | 0.1546                                      | 0.6505  | 0.3859                                      | 0.2185  |
| rs7307562  | LRRK2 | rs2583959  | SNCA  | 0.1361                          | 0.2165  | 0.0732                         | 0.6485  | 0.1767                         | 0.2621  | 0.1348                              | 0.3662  | 0.0702                                  | 0.7273  | 0.1407                                      | 0.3764  | 0.1345                                      | 0.3817  |
| rs11175922 | LRRK2 | rs878918   | MAPT  | -0.1244                         | 0.2225  | -0.1857                        | 0.2245  | -0.0891                        | 0.5316  | -0.1709                             | 0.2341  | -0.0417                                 | 0.8213  | -0.0890                                     | 0.5272  | -0.1797                                     | 0.2278  |
| rs2404835  | LRRK2 | rs356218   | SNCA  | 0.1353                          | 0.2257  | 0.0380                         | 0.8135  | 0.1619                         | 0.3235  | 0.1470                              | 0.3244  | -0.0897                                 | 0.6612  | 0.2514                                      | 0.1169  | 0.0148                                      | 0.9260  |
| rs6581668  | LRRK2 | rs16940806 | MAPT  | 0.1510                          | 0.2277  | 0.2496                         | 0.1974  | 0.0915                         | 0.5937  | 0.0765                              | 0.6608  | 0.2067                                  | 0.3609  | 0.0550                                      | 0.7579  | 0.2512                                      | 0.1579  |
| rs2435211  | MAPT  | REP1-263   | SNCA  | -0.2588                         | 0.2302  | -0.1436                        | 0.6693  | -0.3540                        | 0.2251  | 0.0149                              | 0.9641  | -0.6299                                 | 0.0895  | -0.2149                                     | 0.4863  | -0.3029                                     | 0.3280  |
| rs11175922 | LRRK2 | rs2435211  | MAPT  | 0.1240                          | 0.2353  | 0.1935                         | 0.2248  | 0.0702                         | 0.6259  | 0.2828                              | 0.0476  | -0.0325                                 | 0.8672  | -0.0016                                     | 0.9913  | 0.2790                                      | 0.0745  |
| rs878918   | MAPT  | rs2583959  | SNCA  | -0.1307                         | 0.2357  | -0.1215                        | 0.4664  | -0.1652                        | 0.2779  | 0.1114                              | 0.4774  | -0.3167                                 | 0.1127  | -0.2162                                     | 0.1642  | -0.0928                                     | 0.5602  |
| rs2404835  | LRRK2 | rs356186   | SNCA  | 0.1600                          | 0.2396  | 0.0569                         | 0.7644  | 0.2490                         | 0.2205  | 0.3140                              | 0.0817  | -0.0617                                 | 0.8003  | -0.0251                                     | 0.9031  | 0.3550                                      | 0.0586  |
| rs16940758 | MAPT  | rs2736990  | SNCA  | 0.1566                          | 0.2440  | 0.3877                         | 0.0492  | 0.0091                         | 0.9630  | 0.1862                              | 0.2935  | 0.1302                                  | 0.5900  | -0.0965                                     | 0.6077  | 0.4551                                      | 0.0204  |
| rs16940758 | MAPT  | REP1-259   | SNCA  | -0.1665                         | 0.2453  | -0.1998                        | 0.3368  | -0.1068                        | 0.6060  | -0.2290                             | 0.2180  | -0.2517                                 | 0.3412  | -0.2478                                     | 0.2856  | -0.1521                                     | 0.4148  |
| rs17466521 | LRRK2 | rs16940806 | MAPT  | -0.1608                         | 0.2467  | -0.0606                        | 0.7619  | -0.2707                        | 0.1742  | -0.2220                             | 0.2292  | 0.2231                                  | 0.3998  | 0.1671                                      | 0.3920  | -0.4960                                     | 0.0137  |
| rs2435200  | MAPT  | rs2583959  | SNCA  | -0.1229                         | 0.2552  | -0.1073                        | 0.5114  | -0.0714                        | 0.6332  | -0.2758                             | 0.0687  | 0.0915                                  | 0.6314  | 0.1575                                      | 0.3047  | -0.4223                                     | 0.0067  |
| rs6581668  | LRRK2 | MAPT H1/H2 | MAPT  | 0.1427                          | 0.2572  | 0.2592                         | 0.1882  | 0.0832                         | 0.6265  | 0.0837                              | 0.6316  | 0.1511                                  | 0.5080  | 0.0594                                      | 0.7425  | 0.2270                                      | 0.2013  |
| rs17466521 | LRRK2 | rs8079215  | MAPT  | -0.1336                         | 0.2652  | -0.1496                        | 0.3987  | -0.0812                        | 0.6311  | -0.2017                             | 0.2190  | -0.0906                                 | 0.6725  | -0.2514                                     | 0.1484  | -0.0693                                     | 0.6798  |
| rs17484286 | LRRK2 | rs2572324  | SNCA  | 0.2049                          | 0.2721  | -0.0187                        | 0.9416  | 0.5832                         | 0.0458  | -0.0558                             | 0.8256  | 0.2714                                  | 0.4045  | 0.6432                                      | 0.0283  | -0.0690                                     | 0.7843  |
| rs10784486 | LRRK2 | rs3775439  | SNCA  | 0.1672                          | 0.2794  | 0.3839                         | 0.0784  | 0.0134                         | 0.9536  | 0.0248                              | 0.9081  | 0.3751                                  | 0.1904  | 0.3213                                      | 0.1548  | 0.0216                                      | 0.9201  |
| rs10784486 | LRRK2 | rs8079215  | MAPT  | 0.1180                          | 0.2846  | 0.1342                         | 0.4259  | 0.1232                         | 0.4132  | 0.2008                              | 0.1965  | -0.0721                                 | 0.7271  | 0.0976                                      | 0.5231  | 0.1533                                      | 0.3429  |
| rs17484286 | LRRK2 | rs2583959  | SNCA  | 0.2039                          | 0.2852  | 0.0190                         | 0.9434  | 0.4685                         | 0.1020  | 0.0874                              | 0.7416  | 0.0501                                  | 0.8736  | 0.6343                                      | 0.0263  | -0.1507                                     | 0.5704  |
| rs6581668  | LRRK2 | rs3775439  | SNCA  | 0.1555                          | 0.2854  | 0.2598                         | 0.2069  | 0.1410                         | 0.5112  | -0.0187                             | 0.9275  | 0.6011                                  | 0.0205  | 0.3328                                      | 0.1223  | 0.0028                                      | 0.9887  |
| rs16940758 | MAPT  | REP1 score | SNCA  | 0.1273                          | 0.2855  | 0.1282                         | 0.4748  | 0.1011                         | 0.5464  | 0.2578                              | 0.1120  | 0.0576                                  | 0.7769  | 0.0131                                      | 0.9443  | 0.2194                                      | 0.1669  |
| rs2435211  | MAPT  | rs356186   | SNCA  | 0.1507                          | 0.2860  | -0.2973                        | 0.1576  | 0.6280                         | 0.0028  | 0.2425                              | 0.1959  | -0.2344                                 | 0.3544  | 0.3184                                      | 0.1292  | -0.0150                                     | 0.9388  |
| rs2404835  | LRRK2 | rs8079215  | MAPT  | -0.1188                         | 0.2862  | -0.0076                        | 0.9635  | -0.2665                        | 0.0915  | -0.0854                             | 0.5759  | -0.0566                                 | 0.7820  | -0.2406                                     | 0.1204  | -0.0309                                     | 0.8512  |
| rs17466521 | LRRK2 | rs4792891  | MAPT  | -0.1270                         | 0.2881  | 0.0595                         | 0.7380  | -0.3368                        | 0.0466  | -0.1552                             | 0.3383  | 0.0772                                  | 0.7249  | 0.0304                                      | 0.8578  | -0.3061                                     | 0.0804  |
| rs11175922 | LRRK2 | rs4792891  | MAPT  | -0.1143                         | 0.2910  | -0.1237                        | 0.4377  | -0.0833                        | 0.5860  | 0.0232                              | 0.8782  | -0.3488                                 | 0.0741  | -0.1261                                     | 0.3987  | -0.0691                                     | 0.6702  |
| rs11175922 | LRRK2 | rs3775423  | SNCA  | -0.1817                         | 0.2953  | -0.1486                        | 0.5363  | -0.3212                        | 0.2148  | -0.2116                             | 0.3776  | -0.2133                                 | 0.4768  | 0.0433                                      | 0.8613  | -0.3900                                     | 0.1162  |
| rs2435211  | MAPT  | REP1 score | SNCA  | -0.1010                         | 0.2963  | 0.0740                         | 0.6058  | -0.2886                        | 0.0407  | -0.0537                             | 0.6741  | -0.0681                                 | 0.7074  | -0.1038                                     | 0.4653  | -0.0926                                     | 0.4932  |
| rs8079215  | MAPT  | rs2736990  | SNCA  | 0.1121                          | 0.2988  | -0.0488                        | 0.7492  | 0.3173                         | 0.0458  | 0.2227                              | 0.1336  | 0.0001                                  | 0.9997  | 0.0572                                      | 0.7146  | 0.1686                                      | 0.2631  |
| rs17466521 | LRRK2 | rs2435211  | MAPT  | 0.1161                          | 0.3052  | 0.0521                         | 0.7567  | 0.1514                         | 0.3418  | 0.1850                              | 0.2240  | -0.1478                                 | 0.4837  | 0.1236                                      | 0.4376  | 0.1503                                      | 0.3613  |
| rs17484286 | LRRK2 | rs4792891  | MAPT  | 0.1821                          | 0.3155  | 0.0260                         | 0.9235  | 0.3372                         | 0.1984  | 0.0429                              | 0.8768  | -0.0009                                 | 0.9976  | 0.2818                                      | 0.2750  | 0.1064                                      | 0.6854  |
| rs1491939  | LRRK2 | rs2435211  | MAPT  | -0.2307                         | 0.3176  | -0.5021                        | 0.1698  | -0.0313                        | 0.9202  | -0.0170                             | 0.9596  | -0.1375                                 | 0.7458  | -0.2425                                     | 0.4804  | -0.1914                                     | 0.5409  |
| rs2404835  | LRRK2 | rs2736990  | SNCA  | 0.1045                          | 0.3192  | -0.0392                        | 0.7870  | 0.2203                         | 0.1720  | 0.0578                              | 0.6801  | 0.0882                                  | 0.6321  | 0.2338                                      | 0.1075  | -0.0751                                     | 0.6298  |
| rs17484286 | LRRK2 | rs16940806 | MAPT  | 0.2080                          | 0.3288  | 0.1675                         | 0.5951  | 0.3259                         | 0.2936  | 0.3256                              | 0.3135  | -0.0685                                 | 0.8443  | 0.3238                                      | 0.3032  | 0.1235                                      | 0.6737  |
| rs16940758 | MAPT  | rs3775439  | SNCA  | -0.1829                         | 0.3313  | -0.2149                        | 0.4282  | -0.0672                        | 0.8049  | -0.0604                             | 0.8189  | -0.2867                                 | 0.3735  | -0.3987                                     | 0.1416  | -0.0214                                     | 0.9358  |
| rs8079215  | MAPT  | REP1-263   | SNCA  | 0.2167                          | 0.3338  | 0.1274                         | 0.7161  | 0.2424                         | 0.4168  | 0.2201                              | 0.4845  | 0.4101                                  | 0.3078  | 0.0069                                      | 0.9835  | 0.3215                                      | 0.2926  |
| rs17484286 | LRRK2 | MAPT H1/H2 | MAPT  | 0.2052                          | 0.3345  | 0.1402                         | 0.6582  | 0.3609                         | 0.2408  | 0.3188                              | 0.3246  | -0.1065                                 | 0.7615  | 0.3751                                      | 0.2320  | 0.0692                                      | 0.8139  |
| rs1491939  | LRRK2 | rs3775423  | SNCA  | 0.3204                          | 0.3369  | 0.9423                         | 0.0928  | -0.0488                        | 0.9131  | 1.8116                              | 0.0336  | 0.2981                                  | 0.5664  | 0.2390                                      | 0.5792  | 0.6610                                      | 0.2590  |
| rs2404835  | LRRK2 | rs878918   | MAPT  | -0.1055                         | 0.3383  | 0.0242                         | 0.8814  | -0.2444                        | 0.1193  | -0.0493                             | 0.7383  | -0.2245                                 | 0.2750  | -0.2730                                     | 0.0741  | 0.0782                                      | 0.6289  |
| rs11175922 | LRRK2 | rs9995651  | SNCA  | -0.2156                         | 0.3493  | -0.3228                        | 0.3278  | -0.0977                        | 0.7680  | -0.5293                             | 0.1202  | -0.1791                                 | 0.6344  | 0.2130                                      | 0.5377  | -0.5293                                     | 0.0979  |
| rs1491939  | LRRK2 | rs8079215  | MAPT  | 0.2022                          | 0.3560  | 0.4785                         | 0.1537  | 0.1073                         | 0.7252  | -0.2227                             | 0.4692  | 0.5824                                  | 0.1648  | 0.0602                                      | 0.8533  | 0.2190                                      | 0.4677  |
| rs10784486 | LRRK2 | rs2736990  | SNCA  | 0.0988                          | 0.3581  | 0.0287                         | 0.8498  | 0.3004                         | 0.0634  | -0.0362                             | 0.7980  | 0.3099                                  | 0.1349  | 0.3349                                      | 0.0341  | -0.1053                                     | 0.4825  |
| rs11175922 | LRRK2 | rs356186   | SNCA  | -0.1160                         | 0.3722  | -0.0424                        | 0.8189  | -0.1837                        | 0.3386  | -0.2810                             | 0.1099  | 0.0155                                  | 0.9489  | -0.1358                                     | 0.5152  | -0.1108                                     | 0.5113  |
| rs7307562  | LRRK2 | rs8079215  | MAPT  | -0.0912                         | 0.3799  | -0.1300                        | 0.4081  | -0.0935                        | 0.5158  | -0.0427                             | 0.7710  | -0.0518                                 | 0.7858  | 0.0201                                      | 0.8967  | -0.1705                                     | 0.2254  |
| rs16940758 | MAPT  | rs1372520  | SNCA  | -0.1368                         | 0.3836  | -0.0781                        | 0.7359  | -0.2184                        | 0.3278  | -0.2120                             | 0.2912  | -0.1686                                 | 0.5737  | -0.2750                                     | 0.2975  | -0.0809                                     | 0.6880  |
| rs1491939  | LRRK2 | REP1-263   | SNCA  | -0.3052                         | 0.3896  | 0.1641                         | 0.7834  | -0.6053                        | 0.1992  | 0.6298                              | 0.4090  | -0.4442                                 | 0.3910  | 0.0826                                      | 0.8634  | -0.7892                                     | 0.1608  |

**Supplemental Table 2:** Tests of gene-gene interactions for pairs of SNPs in SNCA, MAPT and LRRK2 in the sample overall as well as in strata based on sex, type of control (sibling or unrelated) and age at onset of the case. Results are sorted by p-value for the interaction in the sample overall.

| SNP1       | Gene1 | SNP2       | Gene2 | Interaction effect ALL pairs |         | Interaction effect CC pairs |         | Interaction effect CS pairs |         | Interaction effect Men-Men pairs |         | Interaction effect Women-Women pairs |         | Interaction effect Age at onset<Q2 pairs |         | Interaction effect Age at onset>Q2 pairs |         |
|------------|-------|------------|-------|------------------------------|---------|-----------------------------|---------|-----------------------------|---------|----------------------------------|---------|--------------------------------------|---------|------------------------------------------|---------|------------------------------------------|---------|
|            |       |            |       | Coefficient                  | P value | Coefficient                 | P value | Coefficient                 | P value | Coefficient                      | P value | Coefficient                          | P value | Coefficient                              | P value | Coefficient                              | P value |
| rs16940806 | MAPT  | rs2583959  | SNCA  | -0.1127                      | 0.3919  | -0.2361                     | 0.2254  | 0.0295                      | 0.8745  | -0.2643                          | 0.1346  | 0.1000                               | 0.6947  | 0.1086                                   | 0.5805  | -0.3172                                  | 0.0772  |
| rs878918   | MAPT  | REP1-259   | SNCA  | 0.1011                       | 0.3975  | 0.0069                      | 0.9676  | 0.2664                      | 0.1352  | -0.1137                          | 0.4636  | 0.3380                               | 0.1439  | -0.0041                                  | 0.9818  | 0.2097                                   | 0.2019  |
| rs17484286 | LRRK2 | rs356218   | SNCA  | 0.1511                       | 0.4010  | -0.0710                     | 0.7833  | 0.5004                      | 0.0609  | -0.1096                          | 0.6556  | 0.2799                               | 0.3750  | 0.5190                                   | 0.0585  | -0.0938                                  | 0.7034  |
| rs6581668  | LRRK2 | rs878918   | MAPT  | 0.0832                       | 0.4040  | 0.0975                      | 0.5187  | 0.0962                      | 0.4848  | 0.0654                           | 0.6376  | 0.0788                               | 0.6681  | -0.0453                                  | 0.7436  | 0.1852                                   | 0.2031  |
| rs6581668  | LRRK2 | rs2736990  | SNCA  | 0.0854                       | 0.4084  | -0.0415                     | 0.7717  | 0.2470                      | 0.1174  | -0.0347                          | 0.7976  | 0.3168                               | 0.1057  | 0.3075                                   | 0.0365  | -0.1474                                  | 0.3200  |
| MAPT H1/H2 | MAPT  | rs2583959  | SNCA  | -0.1095                      | 0.4090  | -0.2224                     | 0.2593  | 0.0227                      | 0.9036  | -0.2406                          | 0.1769  | 0.0680                               | 0.7915  | 0.0621                                   | 0.7516  | -0.2723                                  | 0.1346  |
| rs17484286 | LRRK2 | rs356186   | SNCA  | 0.1948                       | 0.4103  | -0.0339                     | 0.9168  | 0.3926                      | 0.2910  | 0.4008                           | 0.2260  | -0.2688                              | 0.5190  | 0.1651                                   | 0.6317  | -0.2715                                  | 0.4134  |
| rs4792891  | MAPT  | rs9995651  | SNCA  | 0.1936                       | 0.4106  | 0.0090                      | 0.9808  | 0.2847                      | 0.3584  | 0.4537                           | 0.2297  | 0.2638                               | 0.5033  | 0.4575                                   | 0.1860  | -0.0572                                  | 0.8618  |
| rs1491939  | LRRK2 | rs9995651  | SNCA  | 0.3685                       | 0.4289  | 1.7264                      | 0.0881  | -0.0974                     | 0.8618  | 16.8370                          | 0.0480  | 0.2605                               | 0.7220  | 0.3932                                   | 0.5111  | 0.4365                                   | 0.5757  |
| rs7307562  | LRRK2 | rs1372520  | SNCA  | -0.0999                      | 0.4368  | 0.0152                      | 0.9354  | -0.1683                     | 0.3564  | -0.0593                          | 0.7390  | -0.0679                              | 0.7653  | -0.0653                                  | 0.7404  | -0.1226                                  | 0.4734  |
| rs10784486 | LRRK2 | rs2572324  | SNCA  | 0.0895                       | 0.4371  | -0.0704                     | 0.6604  | -0.3465                     | 0.0489  | 0.0239                           | 0.8771  | 0.2319                               | 0.3000  | 0.3380                                   | 0.0521  | -0.1052                                  | 0.5049  |
| rs11175922 | LRRK2 | rs2736990  | SNCA  | -0.0774                      | 0.4390  | -0.0327                     | 0.8117  | -0.1690                     | 0.2676  | -0.0359                          | 0.7892  | -0.0728                              | 0.6851  | -0.3099                                  | 0.0307  | 0.1703                                   | 0.2329  |
| rs1491939  | LRRK2 | rs3775439  | SNCA  | 0.2242                       | 0.4421  | 0.4145                      | 0.3311  | 0.2319                      | 0.5757  | 0.2867                           | 0.5613  | 0.4013                               | 0.3990  | 0.2832                                   | 0.4688  | 0.1660                                   | 0.7150  |
| rs11175922 | LRRK2 | rs8079215  | MAPT  | -0.0778                      | 0.4541  | -0.1740                     | 0.2518  | 0.0224                      | 0.8811  | -0.1475                          | 0.3136  | -0.0338                              | 0.8583  | -0.0394                                  | 0.7868  | -0.1243                                  | 0.4056  |
| rs16940758 | MAPT  | rs356186   | SNCA  | -0.1189                      | 0.4623  | -0.1196                     | 0.6238  | -0.1531                     | 0.4956  | -0.2157                          | 0.2996  | -0.1136                              | 0.7166  | -0.2299                                  | 0.4022  | -0.0993                                  | 0.6281  |
| rs2435211  | MAPT  | rs1372520  | SNCA  | 0.0941                       | 0.4836  | -0.1869                     | 0.3418  | 0.4447                      | 0.0272  | 0.1691                           | 0.3363  | -0.1651                              | 0.4966  | 0.2296                                   | 0.2488  | -0.0174                                  | 0.9256  |
| rs2435211  | MAPT  | REP1-259   | SNCA  | 0.0833                       | 0.4847  | -0.1249                     | 0.4608  | 0.3702                      | 0.0432  | 0.0653                           | 0.6668  | -0.0682                              | 0.7624  | 0.1044                                   | 0.5456  | 0.0612                                   | 0.7157  |
| rs1491939  | LRRK2 | MAPT H1/H2 | MAPT  | 0.1808                       | 0.4955  | 0.2164                      | 0.5853  | 0.0155                      | 0.9671  | 0.3086                           | 0.3962  | -0.1994                              | 0.6989  | -0.0673                                  | 0.8677  | 0.4755                                   | 0.1925  |
| MAPT H1/H2 | MAPT  | rs1372520  | SNCA  | 0.1016                       | 0.4956  | 0.2828                      | 0.1900  | -0.1323                     | 0.5491  | 0.2562                           | 0.2036  | 0.0396                               | 0.8844  | 0.1456                                   | 0.5264  | 0.0548                                   | 0.7848  |
| rs11175922 | LRRK2 | rs1372520  | SNCA  | -0.0825                      | 0.4969  | 0.0057                      | 0.9728  | -0.1685                     | 0.3586  | -0.1662                          | 0.3033  | -0.0425                              | 0.8534  | -0.0964                                  | 0.6182  | -0.0919                                  | 0.5634  |
| MAPT H1/H2 | MAPT  | rs3775439  | SNCA  | -0.1285                      | 0.4980  | -0.1742                     | 0.5179  | -0.1750                     | 0.5270  | 0.0151                           | 0.9551  | -0.1007                              | 0.7656  | -0.0313                                  | 0.9145  | -0.2007                                  | 0.4279  |
| rs10784486 | LRRK2 | rs16940758 | MAPT  | -0.0898                      | 0.5014  | -0.1969                     | 0.3339  | -0.0199                     | 0.9135  | -0.1221                          | 0.5025  | 0.0434                               | 0.8577  | -0.0706                                  | 0.7232  | -0.1355                                  | 0.4577  |
| rs17484286 | LRRK2 | rs2435200  | MAPT  | 0.1121                       | 0.5018  | -0.0756                     | 0.7683  | 0.3255                      | 0.1579  | 0.2977                           | 0.1999  | -0.2182                              | 0.4420  | 0.0583                                   | 0.8110  | 0.1688                                   | 0.4699  |
| rs11175922 | LRRK2 | rs2572324  | SNCA  | -0.0714                      | 0.5026  | 0.0317                      | 0.8294  | -0.1542                     | 0.3411  | -0.0868                          | 0.5435  | 0.0524                               | 0.7930  | -0.2678                                  | 0.0929  | 0.0962                                   | 0.5084  |
| rs4792891  | MAPT  | REP1-259   | SNCA  | -0.0792                      | 0.5077  | 0.0324                      | 0.8543  | -0.2908                     | 0.0965  | 0.2286                           | 0.1560  | -0.3015                              | 0.1763  | -0.1526                                  | 0.3937  | -0.0305                                  | 0.8539  |
| rs2404835  | LRRK2 | rs2435200  | MAPT  | 0.0688                       | 0.5095  | -0.0525                     | 0.7333  | 0.1446                      | 0.3285  | 0.2675                           | 0.0705  | -0.2511                              | 0.1613  | -0.0167                                  | 0.9117  | 0.1560                                   | 0.2872  |
| rs10784486 | LRRK2 | rs1372520  | SNCA  | 0.0867                       | 0.5109  | 0.1214                      | 0.5269  | 0.0553                      | 0.7678  | 0.1622                           | 0.3619  | 0.0481                               | 0.8476  | 0.1676                                   | 0.3856  | 0.0404                                   | 0.8282  |
| rs4792891  | MAPT  | rs3775423  | SNCA  | 0.1204                       | 0.5118  | -0.0346                     | 0.8967  | 0.2113                      | 0.4199  | 0.3938                           | 0.1415  | 0.0253                               | 0.9367  | 0.1242                                   | 0.6460  | 0.1279                                   | 0.6199  |
| rs2435200  | MAPT  | rs2736990  | SNCA  | -0.0654                      | 0.5124  | -0.0625                     | 0.6614  | -0.0451                     | 0.7572  | -0.1040                          | 0.4377  | 0.0863                               | 0.6364  | 0.1757                                   | 0.2214  | -0.3110                                  | 0.0279  |
| rs11175922 | LRRK2 | rs356218   | SNCA  | -0.0690                      | 0.5132  | 0.0676                      | 0.6465  | -0.2192                     | 0.1672  | -0.0325                          | 0.8210  | 0.0418                               | 0.8316  | -0.2745                                  | 0.0776  | 0.1246                                   | 0.3934  |
| rs17484286 | LRRK2 | REP1-259   | SNCA  | 0.1312                       | 0.5147  | 0.0655                      | 0.8047  | 0.2377                      | 0.4702  | 0.1717                           | 0.5597  | 0.0055                               | 0.9866  | 0.3190                                   | 0.2878  | -0.0089                                  | 0.9744  |
| rs2435211  | MAPT  | rs2583959  | SNCA  | 0.0733                       | 0.5265  | 0.1138                      | 0.4994  | -0.0278                     | 0.8673  | -0.0161                          | 0.9174  | 0.0451                               | 0.8321  | -0.1473                                  | 0.3466  | 0.3552                                   | 0.0437  |
| MAPT H1/H2 | MAPT  | rs356186   | SNCA  | 0.1007                       | 0.5294  | 0.4931                      | 0.0372  | -0.3108                     | 0.1837  | 0.2245                           | 0.3117  | 0.1107                               | 0.6973  | 0.1278                                   | 0.6026  | 0.0755                                   | 0.7257  |
| rs4792891  | MAPT  | rs2572324  | SNCA  | 0.0692                       | 0.5398  | 0.1312                      | 0.4283  | 0.0671                      | 0.6771  | -0.1175                          | 0.4459  | 0.2479                               | 0.2505  | 0.1143                                   | 0.4851  | -0.0064                                  | 0.9681  |
| rs4792891  | MAPT  | rs356218   | SNCA  | 0.0667                       | 0.5471  | 0.0064                      | 0.9679  | 0.1621                      | 0.3156  | -0.1516                          | 0.3208  | 0.2890                               | 0.1596  | 0.1222                                   | 0.4408  | -0.0076                                  | 0.9618  |
| rs17484286 | LRRK2 | REP1 score | SNCA  | 0.1001                       | 0.5502  | 0.1149                      | 0.6065  | 0.0617                      | 0.8181  | 0.0080                           | 0.9740  | 0.2491                               | 0.3493  | -0.0747                                  | 0.7739  | 0.2028                                   | 0.3653  |
| rs10784486 | LRRK2 | REP1-259   | SNCA  | 0.0699                       | 0.5528  | 0.1477                      | 0.3861  | 0.0664                      | 0.6960  | 0.0629                           | 0.6909  | 0.0236                               | 0.9177  | 0.2613                                   | 0.1398  | -0.0717                                  | 0.6560  |
| rs878918   | MAPT  | rs9995651  | SNCA  | 0.1458                       | 0.5628  | 0.2454                      | 0.5213  | 0.1219                      | 0.7249  | -0.1093                          | 0.7653  | 0.4028                               | 0.3521  | -0.1714                                  | 0.6480  | 0.4942                                   | 0.1524  |
| rs2404835  | LRRK2 | rs2572324  | SNCA  | 0.0646                       | 0.5744  | -0.0731                     | 0.6540  | 0.1406                      | 0.4135  | 0.0613                           | 0.6874  | -0.1206                              | 0.5750  | 0.1144                                   | 0.5008  | 0.0194                                   | 0.9035  |
| rs2435211  | MAPT  | rs2736990  | SNCA  | -0.0613                      | 0.5790  | 0.0886                      | 0.5714  | -0.2833                     | 0.0876  | -0.1045                          | 0.4763  | -0.1488                              | 0.4581  | -0.2754                                  | 0.0711  | 0.1941                                   | 0.2359  |
| rs2435200  | MAPT  | REP1-263   | SNCA  | 0.0990                       | 0.5805  | 0.0272                      | 0.9168  | 0.1862                      | 0.4670  | -0.0144                          | 0.9541  | 0.1875                               | 0.5477  | 0.2605                                   | 0.3157  | -0.0072                                  | 0.9770  |
| rs16940806 | MAPT  | rs2572324  | SNCA  | 0.0730                       | 0.5850  | 0.0584                      | 0.7722  | 0.1310                      | 0.4834  | -0.0687                          | 0.6987  | 0.1950                               | 0.4734  | 0.2479                                   | 0.2192  | -0.1070                                  | 0.5544  |
| rs2435200  | MAPT  | REP1 score | SNCA  | 0.0477                       | 0.5867  | -0.0731                     | 0.5612  | 0.2294                      | 0.0746  | -0.0883                          | 0.4594  | 0.0433                               | 0.7855  | 0.1405                                   | 0.2937  | -0.0155                                  | 0.8959  |
| rs1491939  | LRRK2 | rs16940806 | MAPT  | 0.1461                       | 0.5880  | 0.2135                      | 0.6090  | -0.0545                     | 0.8839  | 0.2630                           | 0.4702  | -0.1706                              | 0.7552  | -0.1424                                  | 0.7227  | 0.5363                                   | 0.1596  |
| rs1491939  | LRRK2 | rs2435200  | MAPT  | 0.1121                       | 0.5884  | 0.1274                      | 0.6818  | 0.0100                      | 0.9727  | 0.3028                           | 0.3080  | -0.2646                              | 0.5076  | 0.2296                                   | 0.4548  | 0.0818                                   | 0.7745  |
| rs16940806 | MAPT  | rs356186   | SNCA  | 0.0869                       | 0.5884  | 0.4984                      | 0.0345  | -0.3665                     | 0.1228  | 0.2459                           | 0.2691  | 0.0683                               | 0.8081  | 0.1032                                   | 0.6766  | 0.0802                                   | 0.7088  |
| rs7307562  | LRRK2 | REP1-259   | SNCA  | -0.0623                      | 0.5893  | 0.1023                      | 0.5433  | -0.2494                     | 0.1352  | 0.0380                           | 0.8097  | 0.0069                               | 0.9735  | -0.1102                                  | 0.5299  | -0.0213                                  | 0.8906  |

**Supplemental Table 2:** Tests of gene-gene interactions for pairs of SNPs in SNCA, MAPT and LRRK2 in the sample overall as well as in strata based on sex, type of control (sibling or unrelated) and age at onset of the case. Results are sorted by p-value for the interaction in the sample overall.

| SNP1       | Gene1 | SNP2       | Gene2 | Interaction effect<br>ALL pairs |         | Interaction effect<br>CC pairs |         | Interaction effect<br>CS pairs |         | Interaction effect<br>Men-Men pairs |         | Interaction effect<br>Women-Women pairs |         | Interaction effect<br>Age at onset<Q2 pairs |         | Interaction effect<br>Age at onset>Q2 pairs |         |
|------------|-------|------------|-------|---------------------------------|---------|--------------------------------|---------|--------------------------------|---------|-------------------------------------|---------|-----------------------------------------|---------|---------------------------------------------|---------|---------------------------------------------|---------|
|            |       |            |       | Coefficient                     | P value | Coefficient                    | P value | Coefficient                    | P value | Coefficient                         | P value | Coefficient                             | P value | Coefficient                                 | P value | Coefficient                                 | P value |
| rs878918   | MAPT  | rs2736990  | SNCA  | -0.0553                         | 0.5905  | 0.0120                         | 0.9359  | -0.0768                        | 0.6013  | 0.0301                              | 0.8322  | -0.0940                                 | 0.6045  | -0.2863                                     | 0.0537  | 0.1516                                      | 0.2936  |
| rs16940806 | MAPT  | rs1372520  | SNCA  | 0.0793                          | 0.5964  | 0.2644                         | 0.2204  | -0.1781                        | 0.4268  | 0.2570                              | 0.2048  | 0.0027                                  | 0.9921  | 0.1233                                      | 0.5946  | 0.0427                                      | 0.8319  |
| rs17484286 | LRRK2 | rs2435211  | MAPT  | -0.0929                         | 0.5985  | 0.0392                         | 0.8783  | -0.2141                        | 0.3970  | -0.5147                             | 0.0620  | 0.5025                                  | 0.0831  | 0.0383                                      | 0.8726  | -0.2597                                     | 0.3233  |
| rs8079215  | MAPT  | rs1372520  | SNCA  | 0.0706                          | 0.6008  | 0.2089                         | 0.2935  | -0.0075                        | 0.9685  | -0.0677                             | 0.7011  | 0.2999                                  | 0.2461  | -0.0665                                     | 0.7469  | 0.2204                                      | 0.2352  |
| rs2404835  | LRRK2 | rs16940806 | MAPT  | 0.0699                          | 0.6010  | 0.0746                         | 0.7104  | 0.1559                         | 0.4059  | 0.0056                              | 0.9757  | 0.1746                                  | 0.4790  | 0.2160                                      | 0.2597  | -0.0821                                     | 0.6652  |
| rs2435211  | MAPT  | rs356218   | SNCA  | 0.0578                          | 0.6018  | 0.1616                         | 0.3197  | -0.0914                        | 0.5662  | 0.0314                              | 0.8314  | -0.0148                                 | 0.9433  | -0.0873                                     | 0.5631  | 0.2282                                      | 0.1709  |
| rs6581668  | LRRK2 | rs2572324  | SNCA  | 0.0547                          | 0.6138  | -0.1489                        | 0.3425  | 0.1885                         | 0.2303  | 0.0530                              | 0.7236  | 0.0803                                  | 0.6937  | 0.1980                                      | 0.2098  | -0.0742                                     | 0.6255  |
| rs2404835  | LRRK2 | rs3775423  | SNCA  | 0.0893                          | 0.6155  | -0.0224                        | 0.9311  | 0.2130                         | 0.3997  | -0.0065                             | 0.9811  | 0.2600                                  | 0.3699  | 0.0288                                      | 0.9057  | 0.1152                                      | 0.6639  |
| rs1491939  | LRRK2 | rs2583959  | SNCA  | -0.1169                         | 0.6156  | -0.1990                        | 0.5736  | 0.0143                         | 0.9645  | -0.0621                             | 0.8468  | -0.4347                                 | 0.2974  | 0.4085                                      | 0.2254  | -0.6190                                     | 0.0625  |
| rs878918   | MAPT  | REP1 score | SNCA  | -0.0490                         | 0.6156  | 0.0504                         | 0.7236  | -0.1734                        | 0.2142  | 0.0637                              | 0.6165  | -0.1128                                 | 0.5498  | -0.0453                                     | 0.7539  | -0.0651                                     | 0.6306  |
| rs17466521 | LRRK2 | rs3775439  | SNCA  | 0.0825                          | 0.6163  | -0.2310                        | 0.3572  | 0.4017                         | 0.0830  | 0.2876                              | 0.2380  | -0.3350                                 | 0.2444  | 0.0685                                      | 0.7774  | 0.0861                                      | 0.7053  |
| rs16940806 | MAPT  | rs356218   | SNCA  | 0.0648                          | 0.6174  | -0.0490                        | 0.7981  | 0.1795                         | 0.3324  | -0.0596                             | 0.7326  | 0.2143                                  | 0.3899  | 0.2274                                      | 0.2418  | -0.1065                                     | 0.5461  |
| rs4792891  | MAPT  | REP1 score | SNCA  | 0.0462                          | 0.6203  | -0.0889                        | 0.5319  | 0.2066                         | 0.1169  | -0.1284                             | 0.3141  | 0.1635                                  | 0.3357  | 0.1299                                      | 0.3473  | -0.0250                                     | 0.8507  |
| rs2404835  | LRRK2 | rs2435211  | MAPT  | 0.0552                          | 0.6249  | 0.0526                         | 0.7538  | 0.1327                         | 0.4041  | -0.1982                             | 0.2142  | 0.3643                                  | 0.0688  | 0.2721                                      | 0.0837  | -0.1503                                     | 0.3705  |
| MAPT H1/H2 | MAPT  | rs356218   | SNCA  | 0.0637                          | 0.6264  | -0.0461                        | 0.8127  | 0.1745                         | 0.3476  | -0.0372                             | 0.8323  | 0.1710                                  | 0.4985  | 0.1736                                      | 0.3744  | -0.0602                                     | 0.7354  |
| rs2435200  | MAPT  | REP1-259   | SNCA  | -0.0543                         | 0.6274  | 0.1035                         | 0.5168  | -0.3207                        | 0.0542  | 0.1391                              | 0.3522  | -0.0375                                 | 0.8546  | -0.1361                                     | 0.4280  | 0.0095                                      | 0.9496  |
| rs7307562  | LRRK2 | rs2572324  | SNCA  | 0.0537                          | 0.6307  | 0.0134                         | 0.9325  | 0.1202                         | 0.4659  | 0.0144                              | 0.9241  | -0.0746                                 | 0.7180  | 0.0131                                      | 0.9377  | 0.0830                                      | 0.5822  |
| rs17466521 | LRRK2 | rs16940758 | MAPT  | 0.0692                          | 0.6395  | 0.3232                         | 0.1411  | -0.1424                        | 0.5001  | 0.0718                              | 0.7150  | -0.0469                                 | 0.8567  | 0.1937                                      | 0.3728  | -0.0431                                     | 0.8329  |
| rs17484286 | LRRK2 | rs878918   | MAPT  | -0.0837                         | 0.6409  | 0.0340                         | 0.8988  | -0.2149                        | 0.3992  | 0.0962                              | 0.7116  | -0.6282                                 | 0.0422  | -0.2902                                     | 0.2464  | 0.1741                                      | 0.5113  |
| rs1491939  | LRRK2 | rs878918   | MAPT  | -0.1036                         | 0.6417  | 0.0303                         | 0.9322  | -0.1596                        | 0.5888  | -0.2101                             | 0.5287  | -0.1107                                 | 0.7814  | -0.3244                                     | 0.2983  | -0.0147                                     | 0.9639  |
| rs16940806 | MAPT  | rs9995651  | SNCA  | 0.1290                          | 0.6456  | 0.0690                         | 0.8655  | 0.2648                         | 0.5041  | 0.2891                              | 0.4866  | -0.0709                                 | 0.8804  | 0.6227                                      | 0.1575  | -0.2158                                     | 0.5607  |
| rs2435200  | MAPT  | rs3775423  | SNCA  | 0.0777                          | 0.6472  | 0.1192                         | 0.6024  | 0.0080                         | 0.9757  | 0.2508                              | 0.3201  | 0.0391                                  | 0.8858  | 0.0993                                      | 0.6920  | 0.0880                                      | 0.7076  |
| rs878918   | MAPT  | rs1372520  | SNCA  | 0.0603                          | 0.6515  | 0.0550                         | 0.7751  | 0.0786                         | 0.6814  | -0.1284                             | 0.4711  | 0.3779                                  | 0.1334  | -0.0305                                     | 0.8790  | 0.1695                                      | 0.3541  |
| rs16940806 | MAPT  | rs3775439  | SNCA  | -0.0858                         | 0.6526  | -0.0840                        | 0.7557  | -0.1702                        | 0.5414  | 0.0586                              | 0.8284  | -0.0759                                 | 0.8234  | -0.0435                                     | 0.8832  | -0.1109                                     | 0.6605  |
| MAPT H1/H2 | MAPT  | rs2572324  | SNCA  | 0.0603                          | 0.6542  | 0.0400                         | 0.8444  | 0.1278                         | 0.4959  | -0.0567                             | 0.7510  | 0.1129                                  | 0.6795  | 0.2023                                      | 0.3164  | -0.0908                                     | 0.6197  |
| rs8079215  | MAPT  | REP1-259   | SNCA  | 0.0523                          | 0.6576  | 0.0804                         | 0.6326  | 0.0949                         | 0.5861  | -0.1138                             | 0.4630  | 0.1760                                  | 0.4230  | 0.0570                                      | 0.7506  | 0.0504                                      | 0.7513  |
| rs10784486 | LRRK2 | REP1-263   | SNCA  | 0.0859                          | 0.6602  | 0.4313                         | 0.1339  | -0.2670                        | 0.3370  | 0.3189                              | 0.2447  | -0.0376                                 | 0.9090  | -0.0273                                     | 0.9245  | 0.1916                                      | 0.4766  |
| rs10784486 | LRRK2 | rs2435200  | MAPT  | 0.0485                          | 0.6656  | 0.1184                         | 0.4911  | 0.0479                         | 0.7543  | 0.0034                              | 0.9821  | 0.1200                                  | 0.5592  | 0.0084                                      | 0.9559  | 0.1075                                      | 0.5223  |
| rs16940806 | MAPT  | REP1-263   | SNCA  | 0.1067                          | 0.6695  | -0.2930                        | 0.4507  | 0.4390                         | 0.1918  | -0.0390                             | 0.9150  | -0.1109                                 | 0.7966  | 0.3604                                      | 0.3458  | -0.0827                                     | 0.8068  |
| rs17484286 | LRRK2 | rs1372520  | SNCA  | 0.0928                          | 0.6751  | 0.0256                         | 0.9301  | 0.0584                         | 0.8684  | 0.3619                              | 0.2582  | -0.3178                                 | 0.4028  | 0.0612                                      | 0.8513  | 0.1719                                      | 0.5733  |
| rs2435200  | MAPT  | rs356218   | SNCA  | -0.0439                         | 0.6759  | -0.0391                        | 0.8009  | 0.0446                         | 0.7647  | -0.2184                             | 0.1333  | 0.1572                                  | 0.4104  | 0.2091                                      | 0.1673  | -0.3158                                     | 0.0346  |
| rs1491939  | LRRK2 | rs356218   | SNCA  | -0.0892                         | 0.6799  | -0.1591                        | 0.6017  | 0.0380                         | 0.9070  | -0.0422                             | 0.8774  | -0.2932                                 | 0.5075  | 0.1819                                      | 0.5664  | -0.3605                                     | 0.2302  |
| rs1491939  | LRRK2 | rs16940758 | MAPT  | 0.1101                          | 0.6861  | 0.6235                         | 0.1082  | -0.0891                        | 0.8199  | 0.3597                              | 0.3923  | 0.3112                                  | 0.5150  | 0.2914                                      | 0.5315  | 0.0201                                      | 0.9530  |
| rs1491939  | LRRK2 | rs1372520  | SNCA  | -0.0977                         | 0.6948  | -0.1469                        | 0.7104  | -0.2008                        | 0.5487  | 0.0559                              | 0.8736  | -0.5134                                 | 0.2692  | -0.8697                                     | 0.0286  | 0.4231                                      | 0.2153  |
| rs17484286 | LRRK2 | rs8079215  | MAPT  | -0.0704                         | 0.6988  | -0.0316                        | 0.9082  | -0.1885                        | 0.4568  | 0.0179                              | 0.9459  | -0.3746                                 | 0.2320  | -0.1932                                     | 0.4463  | 0.0722                                      | 0.7866  |
| rs1491939  | LRRK2 | REP1 score | SNCA  | -0.0648                         | 0.7005  | 0.0306                         | 0.9054  | -0.1434                        | 0.5392  | 0.1123                              | 0.6676  | -0.0512                                 | 0.8541  | 0.3173                                      | 0.2221  | -0.3553                                     | 0.1400  |
| rs7307562  | LRRK2 | rs2435200  | MAPT  | -0.0386                         | 0.7005  | -0.0552                        | 0.7061  | -0.0580                        | 0.6886  | -0.0386                             | 0.7876  | -0.1458                                 | 0.3972  | -0.0788                                     | 0.5803  | -0.0147                                     | 0.9186  |
| rs17484286 | LRRK2 | rs16940758 | MAPT  | -0.0860                         | 0.7009  | -0.2133                        | 0.5130  | 0.0411                         | 0.8996  | 0.0159                              | 0.9605  | 0.0146                                  | 0.9687  | -0.1795                                     | 0.6021  | -0.1230                                     | 0.6837  |
| rs11175922 | LRRK2 | rs16940758 | MAPT  | 0.0456                          | 0.7120  | 0.1522                         | 0.4382  | -0.0303                        | 0.8536  | -0.0150                             | 0.9315  | -0.1412                                 | 0.5239  | -0.1367                                     | 0.4528  | 0.2343                                      | 0.1727  |
| rs4792891  | MAPT  | REP1-263   | SNCA  | 0.0721                          | 0.7133  | -0.1978                        | 0.5519  | 0.2165                         | 0.3889  | 0.1044                              | 0.7070  | 0.0358                                  | 0.9199  | 0.2447                                      | 0.3815  | -0.0984                                     | 0.7326  |
| MAPT H1/H2 | MAPT  | REP1-263   | SNCA  | 0.0902                          | 0.7134  | -0.4104                        | 0.2816  | 0.4834                         | 0.1453  | -0.0969                             | 0.7870  | -0.0631                                 | 0.8800  | 0.4445                                      | 0.2395  | -0.1677                                     | 0.6132  |
| rs2404835  | LRRK2 | rs9995651  | SNCA  | -0.0826                         | 0.7190  | -0.4943                        | 0.1884  | 0.1279                         | 0.6701  | -0.3407                             | 0.3507  | 0.2656                                  | 0.4820  | -0.1320                                     | 0.6787  | -0.1145                                     | 0.7376  |
| rs17466521 | LRRK2 | REP1-263   | SNCA  | -0.0747                         | 0.7224  | -0.5770                        | 0.0995  | 0.3094                         | 0.2557  | 0.0102                              | 0.9739  | -0.4369                                 | 0.2185  | 0.1658                                      | 0.5649  | -0.4130                                     | 0.1928  |
| rs1491939  | LRRK2 | rs2736990  | SNCA  | 0.0715                          | 0.7230  | 0.1256                         | 0.6593  | 0.1664                         | 0.5796  | 0.0988                              | 0.7261  | -0.0944                                 | 0.7996  | 0.2559                                      | 0.3738  | -0.1324                                     | 0.6522  |
| rs2404835  | LRRK2 | rs4792891  | MAPT  | 0.0399                          | 0.7271  | 0.0248                         | 0.8831  | 0.1010                         | 0.5311  | 0.0755                              | 0.6328  | -0.1390                                 | 0.5052  | 0.2217                                      | 0.1862  | -0.1193                                     | 0.4583  |
| rs8079215  | MAPT  | rs2572324  | SNCA  | -0.0392                         | 0.7303  | -0.1193                        | 0.4578  | 0.0096                         | 0.9541  | 0.1828                              | 0.2543  | -0.1184                                 | 0.5513  | -0.2161                                     | 0.1991  | 0.1445                                      | 0.3611  |
| MAPT H1/H2 | MAPT  | REP1-259   | SNCA  | -0.0459                         | 0.7322  | 0.1239                         | 0.5213  | -0.3584                        | 0.0777  | 0.1695                              | 0.3451  | -0.1127                                 | 0.6457  | -0.1362                                     | 0.5153  | 0.0075                                      | 0.9665  |

**Supplemental Table 2:** Tests of gene-gene interactions for pairs of SNPs in SNCA, MAPT and LRRK2 in the sample overall as well as in strata based on sex, type of control (sibling or unrelated) and age at onset of the case. Results are sorted by p-value for the interaction in the sample overall.

| SNP1       | Gene1 | SNP2       | Gene2 | Interaction effect |         | Interaction effect    |         | Interaction effect    |         |
|------------|-------|------------|-------|--------------------|---------|--------------------|---------|--------------------|---------|--------------------|---------|--------------------|---------|-----------------------|---------|-----------------------|---------|
|            |       |            |       | ALL pairs          |         | CC pairs           |         | CS pairs           |         | Men-Men pairs      |         | Women-Women pairs  |         | Age at onset<Q2 pairs |         | Age at onset>Q2 pairs |         |
|            |       |            |       | Coefficient        | P value | Coefficient           | P value | Coefficient           | P value |
| rs1491939  | LRRK2 | rs356186   | SNCA  | 0.0886             | 0.7344  | 0.2491             | 0.5510  | -0.1833            | 0.6010  | 0.2225             | 0.5534  | -0.1732            | 0.7226  | -0.5553               | 0.1729  | 0.6166                | 0.0962  |
| rs7307562  | LRRK2 | rs2736990  | SNCA  | -0.0337            | 0.7391  | -0.0484            | 0.7353  | -0.0986            | 0.5165  | 0.0179             | 0.8939  | -0.1755            | 0.3435  | -0.0960               | 0.5129  | 0.0226                | 0.8725  |
| rs11175922 | LRRK2 | REP1-263   | SNCA  | 0.0607             | 0.7470  | -0.1467            | 0.5985  | 0.2331             | 0.3765  | -0.1084            | 0.6823  | 0.1736             | 0.5707  | 0.3331                | 0.2218  | -0.1868               | 0.4852  |
| rs4792891  | MAPT  | rs1372520  | SNCA  | 0.0417             | 0.7505  | 0.1899             | 0.3297  | -0.1305            | 0.4858  | 0.1518             | 0.3923  | 0.0195             | 0.9350  | 0.0946                | 0.6277  | -0.0097               | 0.9579  |
| rs11175922 | LRRK2 | rs2583959  | SNCA  | 0.0330             | 0.7587  | 0.1386             | 0.3547  | -0.0681            | 0.6698  | 0.0974             | 0.5164  | 0.1767             | 0.3688  | -0.1475               | 0.3328  | 0.2325                | 0.1305  |
| rs17466521 | LRRK2 | rs2435200  | MAPT  | 0.0347             | 0.7630  | 0.0834             | 0.6238  | -0.0276            | 0.8639  | 0.0492             | 0.7620  | 0.1859             | 0.3638  | 0.1453                | 0.3663  | -0.0745               | 0.6576  |
| rs4792891  | MAPT  | rs3775439  | SNCA  | -0.0470            | 0.7635  | -0.1344            | 0.5418  | -0.1104            | 0.6319  | 0.3335             | 0.1307  | -0.1883            | 0.5100  | -0.0318               | 0.8925  | -0.0703               | 0.7407  |
| rs16940806 | MAPT  | REP1-259   | SNCA  | -0.0402            | 0.7651  | 0.1413             | 0.4656  | -0.3662            | 0.0737  | 0.1614             | 0.3705  | -0.0901            | 0.7114  | -0.1168               | 0.5759  | 0.0149                | 0.9343  |
| rs4792891  | MAPT  | rs2583959  | SNCA  | -0.0321            | 0.7740  | -0.0465            | 0.7791  | -0.0001            | 0.9996  | -0.2020            | 0.1838  | 0.1738             | 0.4063  | 0.0736                | 0.6480  | -0.1358               | 0.3933  |
| MAPT H1/H2 | MAPT  | rs9995651  | SNCA  | 0.0785             | 0.7812  | -0.0354            | 0.9320  | 0.2556             | 0.5187  | 0.1954             | 0.6319  | -0.1113            | 0.8213  | 0.6753                | 0.1354  | -0.3220               | 0.3834  |
| rs17466521 | LRRK2 | rs9995651  | SNCA  | -0.0702            | 0.7868  | -0.3503            | 0.4119  | 0.2404             | 0.4771  | 0.0270             | 0.9488  | -0.4645            | 0.2804  | 0.1545                | 0.6704  | -0.3716               | 0.3252  |
| rs8079215  | MAPT  | rs2583959  | SNCA  | 0.0305             | 0.7884  | -0.0486            | 0.7725  | 0.0818             | 0.6091  | 0.2832             | 0.0822  | -0.1637            | 0.4105  | -0.0808               | 0.6159  | 0.1489                | 0.3657  |
| rs7307562  | LRRK2 | REP1 score | SNCA  | 0.0247             | 0.7903  | -0.1308            | 0.3385  | 0.1618             | 0.2233  | -0.1103            | 0.3929  | 0.0775             | 0.6350  | 0.0109                | 0.9366  | 0.0387                | 0.7637  |
| MAPT H1/H2 | MAPT  | rs2736990  | SNCA  | -0.0327            | 0.7906  | -0.0980            | 0.5840  | 0.0018             | 0.9919  | -0.0878            | 0.5912  | 0.0660             | 0.7740  | 0.0958                | 0.5949  | -0.1840               | 0.2847  |
| rs16940806 | MAPT  | rs3775423  | SNCA  | 0.0596             | 0.7924  | 0.1345             | 0.6652  | -0.0221            | 0.9486  | 0.1905             | 0.5535  | 0.1085             | 0.7792  | 0.0129                | 0.9714  | 0.0942                | 0.7535  |
| rs17466521 | LRRK2 | rs356186   | SNCA  | -0.0385            | 0.7972  | -0.1442            | 0.4942  | 0.0053             | 0.9812  | -0.0824            | 0.6814  | -0.1176            | 0.6722  | -0.2385               | 0.3137  | 0.0776                | 0.6979  |
| rs2404835  | LRRK2 | MAPT H1/H2 | MAPT  | 0.0332             | 0.8032  | 0.0737             | 0.7157  | 0.0984             | 0.5958  | -0.0426            | 0.8154  | 0.1359             | 0.5808  | 0.1737                | 0.3634  | -0.1116               | 0.5561  |
| rs4792891  | MAPT  | rs356186   | SNCA  | 0.0347             | 0.8033  | 0.3795             | 0.0721  | -0.2611            | 0.1825  | 0.1313             | 0.4890  | 0.1265             | 0.6189  | 0.1201                | 0.5581  | -0.0348               | 0.8595  |
| rs7307562  | LRRK2 | REP1-263   | SNCA  | -0.0471            | 0.8055  | -0.2038            | 0.4801  | 0.0158             | 0.9521  | -0.3459            | 0.1989  | 0.4642             | 0.1606  | -0.1347               | 0.6134  | 0.0945                | 0.7350  |
| rs2404835  | LRRK2 | rs2583959  | SNCA  | -0.0269            | 0.8121  | -0.0560            | 0.7361  | -0.0616            | 0.7022  | 0.0242             | 0.8753  | -0.3408            | 0.0954  | 0.0682                | 0.6690  | -0.1254               | 0.4434  |
| rs7307562  | LRRK2 | rs16940758 | MAPT  | -0.0307            | 0.8122  | -0.1329            | 0.4914  | 0.0556             | 0.7598  | -0.0432            | 0.8078  | 0.0298             | 0.8947  | -0.1539               | 0.4131  | 0.1129                | 0.5312  |
| MAPT H1/H2 | MAPT  | REP1 score | SNCA  | 0.0248             | 0.8205  | -0.1855            | 0.2485  | 0.3072             | 0.0560  | -0.1500            | 0.3192  | 0.0306             | 0.8731  | 0.1583                | 0.3698  | -0.0558               | 0.6985  |
| rs2435200  | MAPT  | rs1372520  | SNCA  | -0.0281            | 0.8254  | 0.1488             | 0.4123  | -0.2796            | 0.1357  | 0.0819             | 0.6307  | 0.0345             | 0.8825  | -0.0875               | 0.6623  | -0.0256               | 0.8814  |
| rs8079215  | MAPT  | rs356218   | SNCA  | -0.0232            | 0.8310  | -0.1027            | 0.5026  | 0.0198             | 0.9017  | 0.2023             | 0.1806  | -0.1547            | 0.4259  | -0.1589               | 0.3233  | 0.1241                | 0.4115  |
| rs2404835  | LRRK2 | REP1-259   | SNCA  | 0.0244             | 0.8332  | -0.0711            | 0.6624  | 0.0902             | 0.6016  | 0.0799             | 0.6057  | 0.0814             | 0.6947  | 0.0532                | 0.7574  | 0.0143                | 0.9286  |
| rs10784486 | LRRK2 | REP1 score | SNCA  | -0.0196            | 0.8344  | 0.0232             | 0.8640  | -0.1081            | 0.4247  | 0.0292             | 0.8157  | 0.0037             | 0.9833  | -0.1764               | 0.2149  | 0.0982                | 0.4439  |
| rs7307562  | LRRK2 | MAPT H1/H2 | MAPT  | -0.0257            | 0.8352  | -0.1066            | 0.5485  | 0.0298             | 0.8683  | 0.0195             | 0.9086  | -0.1515            | 0.4995  | -0.1427               | 0.4352  | 0.0825                | 0.6261  |
| rs16940806 | MAPT  | REP1 score | SNCA  | 0.0225             | 0.8375  | -0.1811            | 0.2624  | 0.3026             | 0.0623  | -0.1356            | 0.3718  | 0.0031             | 0.9869  | 0.1232                | 0.4830  | -0.0482               | 0.7406  |
| rs2404835  | LRRK2 | rs3775439  | SNCA  | 0.0296             | 0.8465  | -0.0488            | 0.8275  | 0.1282             | 0.5559  | -0.0070            | 0.9760  | 0.2698             | 0.2941  | 0.0521                | 0.8043  | -0.0260               | 0.9084  |
| rs6581668  | LRRK2 | REP1-263   | SNCA  | -0.0357            | 0.8478  | 0.1683             | 0.5644  | -0.1704            | 0.4915  | 0.0879             | 0.7440  | 0.0495             | 0.8699  | -0.0670               | 0.7970  | -0.0103               | 0.9695  |
| rs7307562  | LRRK2 | rs16940806 | MAPT  | -0.0234            | 0.8485  | -0.1205            | 0.4886  | 0.0483             | 0.7892  | 0.0700             | 0.6802  | -0.2457            | 0.2632  | -0.1251               | 0.4863  | 0.0679                | 0.6877  |
| rs878918   | MAPT  | rs356186   | SNCA  | 0.0267             | 0.8506  | 0.0133             | 0.9485  | 0.0608             | 0.7627  | -0.1229            | 0.5188  | 0.3170             | 0.2236  | -0.1040               | 0.6228  | 0.1924                | 0.3273  |
| rs2404835  | LRRK2 | REP1-263   | SNCA  | 0.0355             | 0.8523  | -0.1067            | 0.7139  | 0.1467             | 0.5752  | -0.1605            | 0.5919  | 0.1614             | 0.5861  | -0.0723               | 0.7844  | 0.1144                | 0.6846  |
| rs878918   | MAPT  | REP1-263   | SNCA  | 0.0377             | 0.8532  | 0.2321             | 0.4591  | -0.0683            | 0.8038  | -0.0943            | 0.7390  | 0.4016             | 0.2653  | -0.2149               | 0.4603  | 0.2966                | 0.3038  |
| rs2404835  | LRRK2 | rs16940758 | MAPT  | -0.0257            | 0.8535  | -0.1933            | 0.3684  | 0.1189             | 0.5309  | 0.0372             | 0.8489  | 0.2082             | 0.4032  | 0.1175                | 0.5666  | -0.1905               | 0.3224  |
| rs11175922 | LRRK2 | rs3775439  | SNCA  | -0.0269            | 0.8569  | -0.1701            | 0.4132  | 0.0240             | 0.9148  | -0.0418            | 0.8435  | -0.1229            | 0.6360  | -0.0996               | 0.6574  | 0.0564                | 0.7792  |
| rs4792891  | MAPT  | rs2736990  | SNCA  | 0.0184             | 0.8600  | -0.0431            | 0.7651  | 0.0469             | 0.7675  | -0.0341            | 0.8098  | 0.1878             | 0.3123  | 0.0963                | 0.5206  | -0.0631               | 0.6731  |
| rs2404835  | LRRK2 | rs1372520  | SNCA  | 0.0225             | 0.8627  | -0.0617            | 0.7290  | 0.0895             | 0.6480  | 0.1507             | 0.3828  | -0.1311            | 0.5683  | -0.0639               | 0.7524  | 0.1141                | 0.5104  |
| rs10784486 | LRRK2 | rs356186   | SNCA  | 0.0244             | 0.8642  | -0.0486            | 0.8166  | 0.0948             | 0.6383  | 0.1139             | 0.5578  | -0.1205            | 0.6568  | 0.2146                | 0.3100  | -0.1498               | 0.4514  |
| rs8079215  | MAPT  | rs356186   | SNCA  | 0.0230             | 0.8726  | 0.1492             | 0.4818  | -0.0448            | 0.8257  | -0.0674            | 0.7229  | 0.2096             | 0.4252  | -0.1200               | 0.5811  | 0.1960                | 0.3223  |
| rs17466521 | LRRK2 | rs878918   | MAPT  | -0.0180            | 0.8730  | -0.1340            | 0.4241  | 0.0985             | 0.5361  | -0.1562            | 0.3009  | 0.1719             | 0.4186  | -0.0535               | 0.7438  | 0.0048                | 0.9759  |
| rs11175922 | LRRK2 | REP1 score | SNCA  | 0.0137             | 0.8768  | -0.0609            | 0.6241  | 0.1141             | 0.3809  | -0.0045            | 0.9695  | 0.0231             | 0.8841  | 0.1627                | 0.2183  | -0.1098               | 0.3679  |
| rs16940806 | MAPT  | rs2736990  | SNCA  | -0.0188            | 0.8783  | -0.0760            | 0.6718  | 0.0099             | 0.9558  | -0.1021            | 0.5320  | 0.1277             | 0.5786  | 0.1446                | 0.4235  | -0.2013               | 0.2400  |
| rs11175922 | LRRK2 | rs2435200  | MAPT  | -0.0158            | 0.8794  | -0.0119            | 0.9385  | -0.0154            | 0.9163  | -0.0972            | 0.5124  | 0.0455             | 0.8000  | 0.1307                | 0.3659  | -0.1803               | 0.2397  |
| MAPT H1/H2 | MAPT  | rs3775423  | SNCA  | 0.0317             | 0.8883  | 0.0282             | 0.9279  | 0.0327             | 0.9230  | 0.1280             | 0.6878  | 0.1220             | 0.7534  | 0.1062                | 0.7638  | -0.0197               | 0.9477  |
| rs6581668  | LRRK2 | rs8079215  | MAPT  | 0.0141             | 0.8903  | 0.0550             | 0.7278  | 0.0020             | 0.9884  | 0.0795             | 0.5908  | -0.0426            | 0.8157  | -0.1684               | 0.2471  | 0.1512                | 0.3084  |
| rs7307562  | LRRK2 | rs356186   | SNCA  | -0.0181            | 0.8917  | 0.1452             | 0.4562  | -0.1191            | 0.5286  | 0.0302             | 0.8708  | -0.0019            | 0.9937  | 0.0106                | 0.9580  | -0.0073               | 0.9677  |

**Supplemental Table 2:** Tests of gene-gene interactions for pairs of SNPs in SNCA, MAPT and LRRK2 in the sample overall as well as in strata based on sex, type of control (sibling or unrelated) and age at onset of the case. Results are sorted by p-value for the interaction in the sample overall.

| SNP1       | Gene1 | SNP2       | Gene2 | Interaction effect<br>ALL pairs |         | Interaction effect<br>CC pairs |         | Interaction effect<br>CS pairs |         | Interaction effect<br>Men-Men pairs |         | Interaction effect<br>Women-Women pairs |         | Interaction effect<br>Age at onset≤Q2 pairs |         | Interaction effect<br>Age at onset>Q2 pairs |         |
|------------|-------|------------|-------|---------------------------------|---------|--------------------------------|---------|--------------------------------|---------|-------------------------------------|---------|-----------------------------------------|---------|---------------------------------------------|---------|---------------------------------------------|---------|
|            |       |            |       | Coefficient                     | P value | Coefficient                    | P value | Coefficient                    | P value | Coefficient                         | P value | Coefficient                             | P value | Coefficient                                 | P value | Coefficient                                 | P value |
| rs6581668  | LRRK2 | rs356218   | SNCA  | -0.0143                         | 0.8948  | -0.2315                        | 0.1354  | 0.1700                         | 0.2795  | -0.0493                             | 0.7407  | -0.0470                                 | 0.8167  | 0.1138                                      | 0.4595  | -0.1509                                     | 0.3255  |
| rs17466521 | LRRK2 | rs3775423  | SNCA  | -0.0245                         | 0.9014  | -0.4322                        | 0.1456  | 0.3778                         | 0.1685  | 0.0917                              | 0.7560  | -0.3298                                 | 0.3316  | 0.0692                                      | 0.8028  | -0.1637                                     | 0.5673  |
| rs7307562  | LRRK2 | rs4792891  | MAPT  | 0.0132                          | 0.9035  | -0.1132                        | 0.4696  | 0.1849                         | 0.2441  | 0.2356                              | 0.1332  | -0.2212                                 | 0.2319  | 0.0411                                      | 0.7906  | 0.0030                                      | 0.9847  |
| rs2435200  | MAPT  | rs9995651  | SNCA  | 0.0236                          | 0.9153  | 0.0483                         | 0.8787  | -0.0654                        | 0.8385  | 0.2746                              | 0.4047  | 0.0350                                  | 0.9258  | 0.1693                                      | 0.6175  | -0.0714                                     | 0.8102  |
| rs1491939  | LRRK2 | REP1-259   | SNCA  | -0.0231                         | 0.9177  | 0.0008                         | 0.9982  | -0.0392                        | 0.9004  | -0.0709                             | 0.8189  | -0.2183                                 | 0.6040  | -0.6776                                     | 0.0670  | 0.3175                                      | 0.2842  |
| rs17466521 | LRRK2 | REP1 score | SNCA  | -0.0101                         | 0.9221  | 0.0966                         | 0.5251  | -0.0543                        | 0.7101  | 0.0370                              | 0.7906  | -0.0219                                 | 0.9064  | 0.1881                                      | 0.2256  | -0.1641                                     | 0.2473  |
| rs8079215  | MAPT  | REP1 score | SNCA  | 0.0094                          | 0.9260  | -0.0386                        | 0.7919  | -0.0057                        | 0.9688  | 0.1272                              | 0.3448  | -0.0454                                 | 0.8071  | -0.0402                                     | 0.7941  | 0.0296                                      | 0.8258  |
| rs10784486 | LRRK2 | rs2583959  | SNCA  | 0.0106                          | 0.9269  | -0.1784                        | 0.2801  | 0.2411                         | 0.1556  | -0.0607                             | 0.6967  | 0.0085                                  | 0.9688  | 0.1616                                      | 0.3297  | -0.1413                                     | 0.3914  |
| rs11175922 | LRRK2 | REP1-259   | SNCA  | -0.0100                         | 0.9275  | 0.0221                         | 0.8870  | -0.0775                        | 0.6351  | -0.0290                             | 0.8447  | -0.0106                                 | 0.9584  | -0.1516                                     | 0.3649  | 0.0963                                      | 0.5172  |
| rs2435211  | MAPT  | rs2572324  | SNCA  | 0.0092                          | 0.9359  | 0.0443                         | 0.7859  | -0.0940                        | 0.5742  | -0.0002                             | 0.9990  | -0.1999                                 | 0.3592  | -0.1507                                     | 0.3416  | 0.1754                                      | 0.2956  |
| rs17466521 | LRRK2 | REP1-259   | SNCA  | -0.0096                         | 0.9407  | -0.3086                        | 0.0919  | 0.2615                         | 0.1726  | -0.0501                             | 0.7668  | -0.1589                                 | 0.5193  | -0.1814                                     | 0.3575  | 0.1091                                      | 0.5325  |
| rs1491939  | LRRK2 | rs2572324  | SNCA  | -0.0155                         | 0.9446  | 0.0184                         | 0.9535  | 0.0107                         | 0.9745  | 0.1280                              | 0.6595  | -0.2623                                 | 0.5483  | 0.3068                                      | 0.3536  | -0.2994                                     | 0.3286  |
| rs10784486 | LRRK2 | rs356218   | SNCA  | -0.0049                         | 0.9647  | -0.2213                        | 0.1583  | 0.3126                         | 0.0591  | -0.0949                             | 0.5202  | 0.1071                                  | 0.6226  | 0.1526                                      | 0.3546  | -0.1327                                     | 0.3808  |
| rs16940758 | MAPT  | rs9995651  | SNCA  | -0.0101                         | 0.9739  | 0.2179                         | 0.6817  | -0.0815                        | 0.8350  | 0.1847                              | 0.7027  | 0.0314                                  | 0.9488  | -0.7207                                     | 0.1055  | 0.6430                                      | 0.1527  |
| rs2404835  | LRRK2 | REP1 score | SNCA  | -0.0030                         | 0.9742  | 0.0260                         | 0.8435  | -0.0206                        | 0.8778  | -0.0846                             | 0.5082  | 0.0035                                  | 0.9820  | -0.0408                                     | 0.7638  | 0.0180                                      | 0.8884  |
| rs16940758 | MAPT  | REP1-263   | SNCA  | 0.0075                          | 0.9766  | -0.2023                        | 0.6256  | 0.1043                         | 0.7586  | 0.4932                              | 0.2221  | -0.3662                                 | 0.3593  | -0.5923                                     | 0.1058  | 0.5542                                      | 0.1432  |
| rs6581668  | LRRK2 | rs16940758 | MAPT  | -0.0034                         | 0.9780  | -0.1935                        | 0.3225  | 0.1238                         | 0.4542  | -0.1882                             | 0.2720  | 0.4121                                  | 0.0678  | 0.0904                                      | 0.6299  | -0.1109                                     | 0.5048  |
| rs2435200  | MAPT  | rs3775439  | SNCA  | -0.0039                         | 0.9782  | -0.0118                        | 0.9536  | -0.0839                        | 0.6991  | 0.2336                              | 0.2700  | -0.0505                                 | 0.8378  | 0.0310                                      | 0.8861  | -0.0035                                     | 0.9859  |
| rs2435200  | MAPT  | rs356186   | SNCA  | -0.0033                         | 0.9807  | 0.3522                         | 0.0788  | -0.3735                        | 0.0526  | 0.0783                              | 0.6734  | 0.1768                                  | 0.4648  | -0.0316                                     | 0.8768  | -0.0169                                     | 0.9279  |
| rs2435200  | MAPT  | rs2572324  | SNCA  | -0.0010                         | 0.9926  | 0.0522                         | 0.7494  | 0.0372                         | 0.8117  | -0.1997                             | 0.1889  | 0.2863                                  | 0.1592  | 0.3089                                      | 0.0599  | -0.2926                                     | 0.0550  |
| rs17466521 | LRRK2 | rs1372520  | SNCA  | -0.0007                         | 0.9962  | -0.1799                        | 0.3674  | 0.1586                         | 0.4568  | -0.0781                             | 0.6791  | -0.1064                                 | 0.6895  | -0.0763                                     | 0.7350  | 0.0370                                      | 0.8443  |

P-values are not corrected for multiple testing.
